# Supplementary material
Source: ML conference proceedings conference paper supplement (https://openreview.net/forum?id=nwlX15Wnr9)
Supplement: supplementary_material [file exploration_neurips_appendix.pdf › exploration_neurips_appendix.pdf]

## 433 A Technical Lemmas

434 In this appendix, we introduce a series of technical lemmas that form the basis of our results. Our  
 435 proofs rely on carefully analyzing how the conditional expectation of  $\ell^*$  changes when conditioning  
 436 on different signals  $\psi$ . Lemmas 13-16 are the main tools we use to analyze the behavior of these  
 437 conditional expectations.

438 Lemma 13 says that for random variable  $X$ , if we have some signal  $R$  that is equal to  $X$  plus noise  
 439 with some small probability and is just pure noise otherwise, then the conditional expectation of  $X$   
 440 given the sign of  $R$  has magnitude that is  $\Omega(\epsilon)$ . In the “initial exploration” phase of our algorithm we  
 441 explore a new (not previously explored) direction with very small probability. Lemma 13 implies that  
 442 this exploration will lead to the conditional expectation of  $\ell^*$  in the newly-explored direction having  
 443 magnitude proportional to the probability of exploration.

444 **Lemma 13.** *Suppose  $X$  is a real-valued  $K$ -sub-gaussian random variable such that  $\mathbb{E}[X] = 0$ ,  
 445  $\mathbb{E}[X^2] = \sigma_X^2$ . Let  $R \sim X + N(0, 1)$  with probability  $\epsilon$  and  $R \sim N(0, 1)$  with probability  $1 - \epsilon$ .  
 446 Then there exists  $c_{L13}$  independent of  $X$  such that*

$$|\mathbb{E}[X \mid 1_{R>0}]| \geq c_{L13} \sigma_X^5 \epsilon.$$

447 The proof of Lemma 13 can be found in Appendix H.1.

448 Lemmas 14 and 15 are the main technical tools that allow for us to exponentially grow the amount of  
 449 exploration in any new direction. Informally, Lemma 14 says that even if  $X$  forms only an  $\epsilon$  fraction  
 450 of the signal  $r$ , conditioning on the sign of  $r$  will increase the conditional expectation of  $X$  by a  
 451 multiplicative factor. This lemma will be applied to the expectation of  $\ell^*$  in the new direction we are  
 452 trying to explore. Lemma 15 says that any random variable conditioned on the sign of  $r$  cannot have  
 453 conditional expectation increase by more than  $O(\epsilon)$ . This will be applied to the expectation of  $\ell^*$  in  
 454 all of the directions that we have already explored. These two lemmas combined allow our algorithm  
 455 to multiplicatively increase the magnitude of the expectation of  $\ell^*$  in an unexplored direction *relative*  
 456 to the already explored directions.

457 **Lemma 14.** *Let  $X$  be a  $K$ -sub-gaussian random variable satisfying  $\mathbb{E}[X] = 0$  and  $\mathbb{E}[X^2] = \sigma_X^2 \geq$   
 458  $c_v$ . For  $Z \sim N(0, \sigma^2)$  such that  $Z \perp\!\!\!\perp X$  and  $\epsilon > 0$ , define  $r = \epsilon X + Z$ . Then there exists a constant  
 459  $\delta_{L14}$  such that if  $\epsilon/\sigma \leq \delta_{L14}$ ,*

$$|\mathbb{E}[X \mid 1_{r>0}]| \geq \frac{\epsilon \sigma_X^2}{2\sigma \sqrt{2\pi}} \geq \frac{c_v \epsilon}{\sqrt{8\pi} \sigma} := \frac{c_{L14} \epsilon}{\sigma}.$$

460 The proof of Lemma 14 can be found in Appendix G.1.

461 **Lemma 15.** *For  $K$ -sub-gaussian random variables  $X, Y$  such that  $\mathbb{E}[X] = \mathbb{E}[Y] = 0$  and for  $Z \sim$   
 462  $N(0, \sigma^2)$  independent of  $X$  and  $Y$ , let  $r \sim \epsilon X + Z$ . Suppose  $\frac{\epsilon}{\sigma} \leq \delta_{L15} := \min \left( 1, \frac{1}{2K\sqrt{\log(2)}} \right)$ .  
 463 Then there exists a constant  $c_{L15} > 0$  such that*

$$|\mathbb{E}[Y \mid 1_{r>0}]| \leq c_{L15} \epsilon / \sigma.$$

464 The proof of Lemma 15 can be found in Appendix G.2.

465 Lemma 16 is a more technical lemma that allows us to better understand the distribution of  $\ell^*$  when  
 466 we condition on averages based on previous rewards. More specifically, this allows us to apply  
 467 Lemma 7 to the random variable  $\mathbf{z}$  as described in Section 2.2. The proof of Lemma 16 can be found  
 468 in Appendix H.

469 **Lemma 16.** *For random variable  $\mathbf{X}$  in  $\mathbb{R}^d$ , define  $\mathbf{Y} = \mathbf{X} + \mathbf{W}$  where  $\mathbf{W} \sim N(\mathbf{0}, \text{Diag}(\mathbf{s}))$  and  
 470  $\mathbf{W}$  is independent of  $\mathbf{X}$ . Define  $\mathbf{Z}(\mathbf{Y}) = \mathbb{E}[\mathbf{X} \mid \mathbf{Y}]$ . If  $\min_{\|\mathbf{v}\|=1} \Pr(\langle \mathbf{X}, \mathbf{v} \rangle \geq c_d) \geq \epsilon_d$  and for all  
 471  $i \in [1 : d]$ ,  $s_i \leq c_{L16} := \frac{c_d^2/32}{\log(4/\epsilon_d)}$  then*

$$\min_{\|\mathbf{v}\|=1} \mathbb{E}[(\langle \mathbf{Z}(\mathbf{Y}), \mathbf{v} \rangle)^+] \geq \frac{\epsilon_d c_d}{4}.$$

472 The final lemma for this section says that any vector in the span of the top eigenvectors of a positive  
 473 semi-definite matrix can be represented as a linear combination of these top eigenvectors with  
 474 coefficients that are not too large. The proof of Lemma 17 can be found in Appendix F.

**Lemma 17.** Let  $\mathbf{v}_1, \mathbf{v}_2, \dots, \mathbf{v}_j \in \mathbb{R}^d$  such that  $\|\mathbf{v}_i\| = 1$ . Define  $\mathbf{M} = \sum_{i=1}^j \mathbf{v}_i \mathbf{v}_i^\top$ . Suppose  $\mathbf{w}_1, \dots, \mathbf{w}_d$  are orthonormal eigenvectors of  $\mathbf{M}$  with corresponding eigenvalues  $\lambda_1 \geq \dots \geq \lambda_d \geq 0$ . Suppose  $\lambda_\ell \geq \epsilon$ . Then for any  $\mathbf{u} \in \text{Span}(\mathbf{w}_1, \dots, \mathbf{w}_\ell)$  such that  $\|\mathbf{u}\| \leq 1$ , we have  $\mathbf{u} = \sum_{i=1}^j c_i \mathbf{v}_i$ , where  $c_i := \sum_{k=1}^\ell \left( \frac{\langle \mathbf{u}, \mathbf{w}_k \rangle \langle \mathbf{v}_i, \mathbf{w}_k \rangle}{\lambda_k} \right)$ . Furthermore,  $\sum_{i=1}^j c_i^2 \leq \frac{1}{\epsilon}$ .

## B Discussion on Assumptions

Here we illustrate why the first two conditions in Assumption 2 are important, by presenting an example where each is absent.

To see why Condition 1 (that  $\ell^*$  is not confined to any half-space) is necessary, suppose  $d = 2$  and that  $\ell^*_1 \sim \text{Uniform}(0.5, 2)$  and  $\ell^*_2 \sim \text{Uniform}(-1, 1)$  and  $\ell^*_1 \perp\!\!\!\perp \ell^*_2$ . This example violates Condition 1, because  $\Pr(\langle -\mathbf{e}_1, \ell^* \rangle \geq 0) = 0$ . However, the only BIC action will for every  $t$  be  $\mathbf{A}^{(t)} = \mathbf{e}_1$ . This is because  $\mathbb{E}[\ell^*_2] = 0$ , and  $\mathbb{E}[\ell^*_1 \mid \Psi] > 0$  for any signal  $\Psi$  based on any historical actions and rewards. Condition 1 is also not overly restrictive so as to make  $\lambda$ -spectral exploration in  $\text{poly}(d)$

steps trivial. For example, suppose  $\ell^*_1 = \begin{cases} -1 & \text{w.p. } e^{-d} \\ 1 & \text{w.p. } 1 - e^{-d} \end{cases}$  and  $\ell^*_2 \sim \text{Uniform}(-1, 1)$ . This prior distribution satisfies Condition 1, but there is still an exponentially small probability that the optimal action is not  $\mathbf{A}^* = (1, 0)$ . Therefore, in this example it is not trivial to guarantee  $\lambda$ -spectral exploration in a polynomial number of samples.

To see why Condition 2 (that  $\ell^*$  has non-degenerate covariance) is needed, consider the following example. Suppose  $d = 2$  and that the coordinates of  $\ell^*$  are independent with:

$$\ell^*_1 = \begin{cases} -1 & \text{w.p. } e^{-d} \\ 1 & \text{w.p. } 1 - e^{-d} \end{cases}, \quad \ell^*_2 = \begin{cases} -2 & \text{w.p. } e^{-d} \\ 0 & \text{w.p. } 1 - 2e^{-d} \\ 2 & \text{w.p. } e^{-d} \end{cases}.$$

Intuitively, this example once again requires exponentially many samples to  $\lambda$ -spectrally explore, because in order to explore  $\ell^*_2$  we need to find a signal based on the history where the expectation of  $\ell^*_2$  is not exponentially smaller than the expectation of  $\ell^*_1$ . However, we cannot do exponential growth on the conditional expectation of  $\ell^*_2$ , as we would need exponentially many samples to sufficiently increase the conditional expectation of  $\ell^*_2$ . Similarly, we would need exponentially many samples to decrease the conditional expectation of  $\ell^*_1$ .

We also note that any sub-gaussian random variable  $X$  satisfying  $\mathbb{P}(|X| > t) \leq 2e^{-t^2/K^2}$  for all  $t \geq 0$  (as in Condition 3) satisfies the following bounds on the moments of  $X$ :

$$\mathbb{E}[X] \leq \mathbb{E}[|X|] = \int_0^\infty \mathbb{P}(|X| > t) dt \leq \int_0^\infty 2e^{-t^2/K^2} dt = K\sqrt{\pi}, \quad (1)$$

$$\mathbb{E}[X^2] = \int_0^\infty \mathbb{P}(X^2 > t) dt \leq \int_0^\infty 2e^{-t/K^2} dt = 2K^2. \quad (2)$$

## C Proof of Lemma 9

*Proof of Lemma 9.* Recall that the input parameters from Algorithm 5 come from their use in Algorithm 4. We compute as follows, with  $\stackrel{d}{=}$  indicating equality in distribution.

$$\begin{aligned} \hat{y}_\ell &= \lambda c_{L16} \sum_{t'=0}^{\frac{1}{\lambda c_{L16}}-1} \sum_{k=1}^j \frac{\langle \mathbf{v}_k, \mathbf{w}_\ell \rangle}{\lambda_\ell} q_k^{t'} \\ &\stackrel{d}{=} \lambda c_{L16} \sum_{t'=0}^{\frac{1}{\lambda c_{L16}}-1} \sum_{k=1}^j \frac{\langle \mathbf{v}_k, \mathbf{w}_\ell \rangle}{\lambda_\ell} \langle \mathbf{v}_k, \ell^* \rangle + \lambda c_{L16} \sum_{t'=0}^{\frac{1}{\lambda c_{L16}}-1} \sum_{k=1}^j \frac{\langle \mathbf{v}_k, \mathbf{w}_\ell \rangle}{\lambda_\ell} N(0, 1) \\ &\stackrel{d}{=} \left\langle \ell^*, \left( \lambda c_{L16} \sum_{t'=0}^{\frac{1}{\lambda c_{L16}}-1} \sum_{k=1}^j \frac{\langle \mathbf{v}_k, \mathbf{w}_\ell \rangle}{\lambda_\ell} \mathbf{v}_k \right) \right\rangle + N\left(0, \lambda c_{L16} \sum_{k=1}^j \frac{\langle \mathbf{v}_k, \mathbf{w}_\ell \rangle^2}{\lambda_\ell^2}\right) \end{aligned}$$

$$\begin{aligned}
& \stackrel{d}{=} \left\langle \boldsymbol{\ell}^*, \left( \lambda c_{L16} \sum_{t'=0}^{\frac{1}{\lambda c_{L16}} - 1} \mathbf{w}_\ell \right) \right\rangle + N \left( 0, \frac{\lambda c_{L16}}{\lambda_\ell^2} \mathbf{w}_\ell^\top \mathbf{M} \mathbf{w}_\ell \right) & [\text{Lemma 17 } (\mathbf{u} = \mathbf{w}_\ell)] \\
& \stackrel{d}{=} x_\ell^* + N \left( 0, c_{L16} \frac{\lambda}{\lambda_\ell} \right).
\end{aligned}$$

504 We will apply Lemma 16 with  $\mathbf{X} = \mathbf{x}^*$ ,  $\mathbf{Y} = \hat{\mathbf{y}}$ , and  $\mathbf{Z}(\mathbf{Y}) = \mathbf{z}(\hat{\mathbf{y}})$ . As shown above, (and using that  
505  $\frac{\lambda}{\lambda_\ell} \leq 1$  for all  $\ell \leq \ell_\lambda$ ) we have that  $\mathbf{Y} - \mathbf{X}$  has the appropriate distribution. The last thing we need  
506 to show is that

$$\begin{aligned}
\min_{\|\mathbf{q}\|=1} \Pr(\langle \mathbf{X}, \mathbf{q} \rangle \geq c_d) &= \min_{\|\mathbf{q}\|=1} \Pr \left( \sum_{\ell=1}^{\ell_\lambda} \langle \boldsymbol{\ell}^*, \mathbf{w}_\ell \rangle q_\ell \geq c_d \right) \\
&= \min_{\|\mathbf{q}\|=1} \Pr \left( \left\langle \boldsymbol{\ell}^*, \left( \sum_{\ell=1}^{\ell_\lambda} q_\ell \mathbf{w}_\ell \right) \right\rangle \geq c_d \right) \\
&\geq \min_{\|\mathbf{v}\|=1} \Pr(\langle \boldsymbol{\ell}^*, \mathbf{v} \rangle \geq c_d) \\
&\geq \epsilon_d. & [\text{Assumption 1}].
\end{aligned}$$

507 This means we can apply Lemma 16 to get that

$$\min_{\|\mathbf{v}\|=1} \mathbb{E}[\langle \mathbf{z}(\hat{\mathbf{y}}), \mathbf{v} \rangle^+] \geq \frac{\epsilon_d c_d}{4}.$$

508 We have therefore shown that  $\mathbf{z}(\hat{\mathbf{y}})$  satisfies the assumptions of Lemma 7 with  $\epsilon = \frac{\epsilon_d c_d}{4}$ .  $\square$

## 509 D Proof of Lemma 6

510 *Proof of Lemma 6.* The BIC optimal action given  $\psi$  is

$$\begin{aligned}
\mathbf{A}^* &= \arg \max_{\mathbf{A} \in S^{d-1}} \mathbb{E}[\langle \mathbf{A}, \boldsymbol{\ell}^* \rangle \mid \psi] \\
&= \arg \max_{\mathbf{A} \in S^{d-1}} \langle \mathbf{A}, \mathbb{E}[\boldsymbol{\ell}^* \mid \psi] \rangle.
\end{aligned}$$

511 Therefore, the BIC action is  $\mathbf{A}^* = \frac{\mathbb{E}[\boldsymbol{\ell}^* \mid \psi]}{\|\mathbb{E}[\boldsymbol{\ell}^* \mid \psi]\|}$  if  $\|\mathbb{E}[\boldsymbol{\ell}^* \mid \psi]\| \neq 0$ . If  $\|\mathbb{E}[\boldsymbol{\ell}^* \mid \psi]\| = 0$ , then any action  
512 is BIC including  $\mathbf{v}$ .  $\square$

## 513 E Proof of Lemma 8

514 We will prove the following equivalent lemma.

515 **Lemma 18.** *In the setting of Lemma 8,*

$$\sum_{i=1}^{\ell} \lambda'_i \leq (1 - \epsilon/2) + \sum_{i=1}^{\ell} \lambda_i$$

516 We first observe that Lemma 18 implies the desired Lemma 8.

517 *Proof of Lemma 8.* By linearity of trace,

$$\sum_{i=1}^d \lambda'_i = 1 + \sum_{i=1}^d \lambda_i.$$

518 Therefore, Lemma 18 implies the desired result that

$$\sum_{i=\ell+1}^d \lambda'_i \geq \epsilon/2 + \sum_{i=\ell+1}^d \lambda_i. \quad \square$$

519 *Proof of Lemma 18.* First, note the following, where the max is over  $\mathbf{x}_1, \dots, \mathbf{x}_\ell$  that are orthonormal.

$$\sum_{i=1}^{\ell} \lambda'_i = \max_{\mathbf{x}_1, \dots, \mathbf{x}_\ell} \sum_{i=1}^{\ell} \mathbf{x}_i^T \mathbf{M}' \mathbf{x}_i = \max_{\mathbf{x}_1, \dots, \mathbf{x}_\ell} \left( \sum_{i=1}^{\ell} \mathbf{x}_i^T \mathbf{M} \mathbf{x}_i + \sum_{i=1}^{\ell} \langle \mathbf{x}_i, \mathbf{u} \rangle^2 \right).$$

520 Define

$$\mathbf{x}_1^*, \dots, \mathbf{x}_\ell^* = \arg \max_{\mathbf{x}_1, \dots, \mathbf{x}_\ell} \sum_{i=1}^{\ell} \mathbf{x}_i^T \mathbf{M}' \mathbf{x}_i. \quad (4)$$

521 We will now prove (by contradiction) that for all  $i \leq \ell$ ,  $\|\mathcal{P}_{S^\perp}(\mathbf{x}_i^*)\|_2^2 \leq \frac{\epsilon^2}{100d^2}$ . Suppose that there  
522 exists some  $i' \in 1, \dots, \ell$  such that  $\|\mathcal{P}_{S^\perp}(\mathbf{x}_{i'}^*)\|_2^2 > \frac{\epsilon^2}{100d^2}$ . Then we find

$$\begin{aligned} \sum_{i=1}^{\ell} (\mathbf{x}_i^*)^T \mathbf{M}' \mathbf{x}_i^* &= \sum_{i=1}^{\ell} (\mathbf{x}_i^*)^T \mathbf{M} \mathbf{x}_i^* + \sum_{i=1}^{\ell} \langle \mathbf{x}_i^*, \mathbf{u} \rangle^2 \\ &\leq 1 + \sum_{i=1}^{\ell} (\mathbf{x}_i^*)^T \mathbf{M} \mathbf{x}_i^* && [\mathbf{x}_i^* \text{ orthonormal so } \sum_{i=1}^{\ell} \langle \mathbf{x}_i^*, \mathbf{u} \rangle^2 \leq \|\mathbf{u}\|^2 \leq 1] \\ &= 1 + \sum_{i=1}^{\ell} (\mathcal{P}_{S^\perp}(\mathbf{x}_i^*)^T \mathbf{M} \mathcal{P}_{S^\perp}(\mathbf{x}_i^*) + \mathcal{P}_S(\mathbf{x}_i^*)^T \mathbf{M} \mathcal{P}_S(\mathbf{x}_i^*)) \\ &= 1 + \sum_{i=1}^{\ell} \mathcal{P}_{S^\perp}(\mathbf{x}_i^*)^T \mathbf{M} \mathcal{P}_{S^\perp}(\mathbf{x}_i^*) + \sum_{i=1}^{\ell} \mathcal{P}_S(\mathbf{x}_i^*)^T \mathbf{M} \mathcal{P}_S(\mathbf{x}_i^*) \\ &= 1 + d\epsilon + \sum_{i=1}^{\ell} \mathcal{P}_S(\mathbf{x}_i^*)^T \mathbf{M} \mathcal{P}_S(\mathbf{x}_i^*) && [S^\perp = \text{span of evecors with evalues } \leq \epsilon] \\ &= 1 + d\epsilon + \sum_{i=1}^{\ell} \left( \sum_{k=1}^{\ell_\epsilon} \langle \mathbf{x}_i^*, \mathbf{w}_k \rangle \mathbf{w}_k \right)^T \mathbf{M} \left( \sum_{k=1}^{\ell_\epsilon} \langle \mathbf{x}_i^*, \mathbf{w}_k \rangle \mathbf{w}_k \right) \\ &= 1 + d\epsilon + \sum_{i=1}^{\ell} \sum_{k=1}^{\ell_\epsilon} \langle \mathbf{x}_i^*, \mathbf{w}_k \rangle^2 \mathbf{w}_k^T \mathbf{M} \mathbf{w}_k \\ &= 1 + d\epsilon + \sum_{i=1}^{\ell} \sum_{k=1}^{\ell_\epsilon} \langle \mathbf{x}_i^*, \mathbf{w}_k \rangle^2 \lambda_k. \end{aligned} \quad (5)$$

523 Because  $\mathbf{x}_i^*$  are orthonormal, we know that  $\sum_{i=1}^{\ell} \langle \mathbf{x}_i^*, \mathbf{w}_k \rangle^2 \leq \|\mathbf{w}_k\|_2^2 = 1$ . Because we assumed  
524 that  $\|\mathcal{P}_{S^\perp}(\mathbf{x}_{i'}^*)\|_2^2 > \frac{\epsilon^2}{100d^2}$ , we know that  $\sum_{i=1}^{\ell} \sum_{k=1}^{\ell_\epsilon} \langle \mathbf{x}_i^*, \mathbf{w}_k \rangle^2 = \sum_{i=1}^{\ell} \|\mathcal{P}_S(\mathbf{x}_i^*)\|^2 \leq \ell - \frac{\epsilon^2}{100d^2}$ .  
525 Combining these two statements with the fact that  $\lambda_k$  is decreasing in  $k$ ,

$$\sum_{i=1}^{\ell} \sum_{k=1}^{\ell_\epsilon} \langle \mathbf{x}_i^*, \mathbf{w}_k \rangle^2 \lambda_k = \sum_{k=1}^{\ell_\epsilon} \sum_{i=1}^{\ell} \langle \mathbf{x}_i^*, \mathbf{w}_k \rangle^2 \lambda_k \leq \left( 1 - \frac{\epsilon^2}{100d^2} \right) \lambda_\ell + \sum_{i=1}^{\ell-1} \lambda_i.$$

526 Continuing where we left off with Equation (5), we have that

$$\begin{aligned} &= 1 + d\epsilon + \sum_{i=1}^{\ell} \sum_{k=1}^{\ell_\epsilon} \langle \mathbf{x}_i^*, \mathbf{w}_k \rangle^2 \lambda_k \leq 1 + d\epsilon + \left( 1 - \frac{\epsilon^2}{100d^2} \right) \lambda_\ell + \sum_{i=1}^{\ell-1} \lambda_i \\ &\leq 1 + d\epsilon - \frac{\epsilon^2}{100d^2} \lambda_\ell + \sum_{i=1}^{\ell} \lambda_i \\ &\leq 1 + d\epsilon - 2d + \sum_{i=1}^{\ell} \lambda_i && [\lambda_\ell \geq \frac{200d^3}{\epsilon^2}] \\ &< \sum_{i=1}^{\ell} \lambda_i && [\epsilon < 1] \end{aligned}$$

$$= \sum_{i=1}^{\ell} \mathbf{w}_i^{\top} \mathbf{M} \mathbf{w}_i \leq \sum_{i=1}^{\ell} \mathbf{w}_i^{\top} \mathbf{M}' \mathbf{w}_i.$$

Therefore, we have a contradiction, as  $\mathbf{x}_1^*, \dots, \mathbf{x}_{\ell}^*$  cannot be a solution to Equation (4) because these vectors are strictly beaten by  $\mathbf{w}_1, \dots, \mathbf{w}_{\ell}$ .

Therefore, we have shown that  $\|\mathcal{P}_{S^{\perp}}(\mathbf{x}_i^*)\|_2^2 \leq \frac{\epsilon^2}{100d^2}$  for all  $i$ .

In the following equation, we define  $P_S$  as the projection matrix for projecting a vector onto  $S$ . Now, we have that

$$\begin{aligned} \sum_{i=1}^{\ell} \lambda'_i &= \sum_{i=1}^{\ell} (\mathbf{x}_i^*)^{\top} \mathbf{M} \mathbf{x}_i^* + \sum_{i=1}^{\ell} \langle \mathbf{x}_i^*, \mathbf{u} \rangle^2 \\ &\leq \sum_{i=1}^{\ell} \lambda_i + \sum_{i=1}^{\ell} \langle \mathbf{x}_i^*, \mathbf{u} \rangle^2 \\ &\leq \sum_{i=1}^{\ell} \lambda_i + \sum_{i=1}^{\ell} \left( \langle \mathcal{P}_S(\mathbf{x}_i^*), \mathcal{P}_S(\mathbf{u}) \rangle + \langle \mathcal{P}_{S^{\perp}}(\mathbf{x}_i^*), \mathcal{P}_{S^{\perp}}(\mathbf{u}) \rangle \right)^2 \\ &\leq \sum_{i=1}^{\ell} \lambda_i + \sum_{i=1}^{\ell} \left( |\langle \mathcal{P}_S(\mathbf{x}_i^*), \mathcal{P}_S(\mathbf{u}) \rangle| + \frac{\epsilon}{10d} \right)^2 \quad [\|\mathcal{P}_{S^{\perp}}(\mathbf{x}_i^*)\|_2^2 \leq \frac{\epsilon^2}{100d^2}] \\ &= \sum_{i=1}^{\ell} \lambda_i + \sum_{i=1}^{\ell} \left( \langle \mathcal{P}_S(\mathbf{x}_i^*), \mathcal{P}_S(\mathbf{u}) \rangle^2 + \frac{\epsilon}{5d} |\langle \mathcal{P}_S(\mathbf{x}_i^*), \mathcal{P}_S(\mathbf{u}) \rangle| + \frac{\epsilon^2}{100d^2} \right) \\ &\leq \sum_{i=1}^{\ell} \lambda_i + \sum_{i=1}^{\ell} \left( \langle \mathcal{P}_S(\mathbf{x}_i^*), \mathcal{P}_S(\mathbf{u}) \rangle^2 + \frac{\epsilon}{5d} + \frac{\epsilon^2}{100d^2} \right) \\ &\leq \sum_{i=1}^{\ell} \lambda_i + \frac{\epsilon}{5} + \frac{\epsilon^2}{100d} + \sum_{i=1}^{\ell} \langle \mathcal{P}_S(\mathbf{x}_i^*), \mathcal{P}_S(\mathbf{u}) \rangle^2 \\ &= \sum_{i=1}^{\ell} \lambda_i + \frac{\epsilon}{5} + \frac{\epsilon^2}{100d} + \sum_{i=1}^{\ell} ((\mathbf{x}_i^*)^{\top} P_S^{\top} P_S \mathbf{u})^2 \\ &= \sum_{i=1}^{\ell} \lambda_i + \frac{\epsilon}{5} + \frac{\epsilon^2}{100d} + \sum_{i=1}^{\ell} ((\mathbf{x}_i^*)^{\top} P_S \mathbf{u})^2 \\ &= \sum_{i=1}^{\ell} \lambda_i + \frac{\epsilon}{5} + \frac{\epsilon^2}{100d} + \sum_{i=1}^{\ell} \langle \mathbf{x}_i^*, \mathcal{P}_S(\mathbf{u}) \rangle^2 \\ &\leq \sum_{i=1}^{\ell} \lambda_i + \frac{\epsilon}{5} + \frac{\epsilon^2}{100d} + \|\mathcal{P}_S(\mathbf{u})\|_2^2 \\ &\leq \sum_{i=1}^{\ell} \lambda_i + \frac{\epsilon}{5} + \frac{\epsilon^2}{100d} + 1 - \epsilon \\ &\leq \sum_{i=1}^{\ell} \lambda_i + (1 - \epsilon/2). \end{aligned}$$

This completes the proof of Lemma 18.  $\square$

## F Proof of Lemma 17

*Proof of Lemma 17.* Define  $\mathbf{A} \in \mathbb{R}^{j \times d}$  with rows corresponding to  $\mathbf{v}_1, \dots, \mathbf{v}_j$ . Then  $\mathbf{M} = \mathbf{A}^{\top} \mathbf{A}$ . We want to write  $\mathbf{u} = \mathbf{A}^{\top} \mathbf{c}$  for  $\mathbf{c} \in \mathbb{R}^j$ .

536 Because  $\mathbf{w}_1, \dots, \mathbf{w}_\ell$  are orthonormal and  $\mathbf{u} \in \text{Span}(\mathbf{w}_1, \dots, \mathbf{w}_\ell)$ , we have that

$$\mathbf{u} = \sum_{i=1}^{\ell} \langle \mathbf{u}, \mathbf{w}_i \rangle \mathbf{w}_i$$

537 Because  $\mathbf{w}_i$  is an eigenvector of  $\mathbf{M}$  with eigenvalue  $\lambda_i$ , we know that for any  $i \leq \ell$

$$\lambda_i \mathbf{w}_i = \mathbf{M} \mathbf{w}_i = \mathbf{A}^\top \mathbf{A} \mathbf{w}_i$$

538 Rearranging terms and multiplying both sides by  $\langle \mathbf{u}, \mathbf{w}_i \rangle$ , we have that for any  $i \leq \ell$

$$\langle \mathbf{u}, \mathbf{w}_i \rangle \mathbf{w}_i = \mathbf{A}^\top \left( \frac{\langle \mathbf{u}, \mathbf{w}_i \rangle \mathbf{A} \mathbf{w}_i}{\lambda_i} \right).$$

539 Therefore, we have that

$$\mathbf{u} = \sum_{i=1}^{\ell} \langle \mathbf{u}, \mathbf{w}_i \rangle \mathbf{w}_i = \sum_{i=1}^{\ell} \mathbf{A}^\top \left( \frac{\langle \mathbf{u}, \mathbf{w}_i \rangle \mathbf{A} \mathbf{w}_i}{\lambda_i} \right) = \mathbf{A}^\top \sum_{i=1}^{\ell} \left( \frac{\langle \mathbf{u}, \mathbf{w}_i \rangle \mathbf{A} \mathbf{w}_i}{\lambda_i} \right).$$

540 Now, we can define

$$\mathbf{c} = \sum_{i=1}^{\ell} \left( \frac{\langle \mathbf{u}, \mathbf{w}_i \rangle \mathbf{A} \mathbf{w}_i}{\lambda_i} \right) = \mathbf{A} \sum_{i=1}^{\ell} \frac{\langle \mathbf{u}, \mathbf{w}_i \rangle \mathbf{w}_i}{\lambda_i}.$$

541 This implies that

$$\begin{aligned} \|\mathbf{c}\|_2^2 &= \left\| \mathbf{A} \sum_{i=1}^{\ell} \frac{\langle \mathbf{u}, \mathbf{w}_i \rangle \mathbf{w}_i}{\lambda_i} \right\|_2^2 \\ &= \left( \sum_{i=1}^{\ell} \frac{\langle \mathbf{u}, \mathbf{w}_i \rangle \mathbf{w}_i}{\lambda_i} \right)^\top \mathbf{M} \left( \sum_{i=1}^{\ell} \frac{\langle \mathbf{u}, \mathbf{w}_i \rangle \mathbf{w}_i}{\lambda_i} \right) \\ &= \sum_{i=1}^{\ell} \lambda_i \left( \frac{\langle \mathbf{u}, \mathbf{w}_i \rangle}{\lambda_i} \right)^2 && [\mathbf{w}_i^\top \mathbf{M} \mathbf{w}_i = \lambda_i] \\ &= \sum_{i=1}^{\ell} \frac{\langle \mathbf{u}, \mathbf{w}_i \rangle^2}{\lambda_i} \\ &\leq \frac{\|\mathbf{u}\|_2^2}{\epsilon} \\ &\leq \frac{1}{\epsilon}. \end{aligned}$$

542 This vector  $\mathbf{c}$  therefore satisfies the desired properties. □

## 543 G Proof of Lemma 7

544 We begin by proving the following lemma.

545 **Lemma 19.** *Let  $\mu$  be a probability distribution on  $\mathbb{R}^d$  with finite first moment and suppose*

$$\min_{\|\mathbf{v}\|=1} \mathbb{E}^{\mathbf{x} \sim \mu} [\langle \mathbf{v}, \mathbf{x} \rangle_+] \geq \epsilon.$$

546 *Then for any  $\mathbf{w}$  with  $\|\mathbf{w}\| < \epsilon$  there is a  $[0, 1]$ -valued measurable function  $f$  such that  $\mathbb{E}[\mathbf{x}f(\mathbf{x})] = \mathbf{w}$ .*

547 *Proof of Lemma 19.* Let  $K$  be the set of possible vectors  $\mathbb{E}[\mathbf{x}f(\mathbf{x})]$  where  $f$  is a  $[0, 1]$ -valued  
 548 measurable function. Then for any  $\mathbf{a}, \mathbf{b} \in K$ , there exist corresponding  $[0, 1]$ -valued functions  $f^a$  and  
 549  $f^b$  such that  $\mathbb{E}[\mathbf{x}f^a(\mathbf{x})] = \mathbf{a}$  and  $\mathbb{E}[\mathbf{x}f^b(\mathbf{x})] = \mathbf{b}$ . Therefore for any  $t \in [0, 1]$ ,  $t\mathbf{a} + (1-t)\mathbf{b} \in K$   
 550 because  $\mathbb{E}[\mathbf{x}f^t(\mathbf{x})] = t\mathbf{a} + (1-t)\mathbf{b}$  for  $f^t(\mathbf{x}) = tf^a(\mathbf{x}) + (1-t)f^b(\mathbf{x})$ . This implies that  $K$  is  
 551 convex.

552 We will now prove the desired result by contradiction. Suppose  $\mathbf{w} \notin K$ . Because  $K$  is convex, if  
 553  $\mathbf{w} \notin K$  then there is a “separating hyperplane” unit vector  $\mathbf{v}$  such that

$$\sup_{\mathbf{u} \in K} \langle \mathbf{v}, \mathbf{u} \rangle \leq \langle \mathbf{v}, \mathbf{w} \rangle.$$

554 (Note that we do not argue here that  $K$  is closed.) Because by assumption we have that  $\|\mathbf{w}\| < \epsilon$ ,  
 555 this implies that

$$\sup_{\mathbf{u} \in K} \langle \mathbf{v}, \mathbf{u} \rangle < \epsilon.$$

556 For any  $\mathbf{v}$ , by definition of  $K$  and linearity of expectation we have that

$$\begin{aligned} \sup_{\mathbf{u} \in K} \langle \mathbf{v}, \mathbf{u} \rangle &= \sup_{f: \mathbb{R}^d \rightarrow [0,1]} \langle \mathbf{v}, \mathbb{E}^{x \sim \mu} [\mathbf{x} f(\mathbf{x})] \rangle \\ &= \sup_{f: \mathbb{R}^d \rightarrow [0,1]} \mathbb{E}^{x \sim \mu} [f(\mathbf{x}) \langle \mathbf{v}, \mathbf{x} \rangle] \\ &= \mathbb{E}^{x \sim \mu} [\langle \mathbf{v}, \mathbf{x} \rangle_+] \\ &\geq \epsilon. \end{aligned}$$

557 where the last line followed from the assumption of the lemma. This gives a contradiction, and  
 558 therefore  $\mathbf{w} \in K$  must be true.  $\square$

559 *Proof of Lemma 7.* Applying the above lemma with  $\mathbf{w} = \mathbf{0}$ , there exists  $f^0 : \mathbb{R}^d \rightarrow [0, 1]$  such that  
 560  $\mathbb{E}[\mathbf{x} f^0(\mathbf{x})] = \mathbf{0}$ . Define the function  $f'$  as  $f'(\mathbf{x}) = \frac{f^0(\mathbf{x}) + 2\epsilon}{4 \max(\|\mathbb{E}[\mathbf{x}]\|, 1)}$ . By this construction,

$$\|\mathbb{E}[\mathbf{x} f'(\mathbf{x})]\| = \left\| \frac{\mathbb{E}[\mathbf{x} f^0(\mathbf{x})] + 2\epsilon \mathbb{E}[\mathbf{x}]}{4 \max(\|\mathbb{E}[\mathbf{x}]\|, 1)} \right\| = \frac{2\epsilon \|\mathbb{E}[\mathbf{x}]\|}{4 \max(\|\mathbb{E}[\mathbf{x}]\|, 1)} \leq \frac{\epsilon}{2}.$$

561 Therefore,  $\mathbf{w} := -\mathbb{E}[\mathbf{x} f'(\mathbf{x})]$  satisfies  $\|\mathbf{w}\| < \epsilon$ . Applying the above lemma again, there exists  
 562  $f^w : \mathbb{R}^d \rightarrow [0, 1]$  such that  $\mathbb{E}[\mathbf{x} f^w(\mathbf{x})] = -\mathbb{E}[\mathbf{x} f'(\mathbf{x})]$ . Now define  $f(\mathbf{x}) = \frac{f'(\mathbf{x}) + f^w(\mathbf{x})}{2}$ . By  
 563 construction, we have that  $1 \geq f(\mathbf{x}) \geq \frac{f'(\mathbf{x})}{2} \geq \frac{\epsilon}{4 \max(\|\mathbb{E}[\mathbf{x}]\|, 1)}$ . Furthermore, by linearity of  
 564 expectation and the construction of  $f^w$  we have that

$$\mathbb{E}[\mathbf{x} f(\mathbf{x})] = \mathbb{E} \left[ \mathbf{x} \frac{f'(\mathbf{x}) + f^w(\mathbf{x})}{2} \right] = \frac{1}{2} (\mathbb{E}[\mathbf{x} f'(\mathbf{x})] + \mathbb{E}[\mathbf{x} f^w(\mathbf{x})]) = \frac{1}{2} (\mathbb{E}[\mathbf{x} f'(\mathbf{x})] - \mathbb{E}[\mathbf{x} f'(\mathbf{x})]) = 0.$$

565 Therefore,  $f(\mathbf{x})$  is a  $\left[ \frac{\epsilon}{4 \max(\|\mathbb{E}[\mathbf{x}]\|, 1)}, 1 \right]$ -valued function that satisfies  $\mathbb{E}[\mathbf{x} f(\mathbf{x})] = 0$  as desired.  $\square$

## 566 G.1 Proof of Lemma 14

567 **Lemma 20.** Let  $\Phi^C(x) = \mathbb{P}(Z > x)$  for  $Z \sim N(0, 1)$ . Then for  $|x| \leq 1$ ,

$$\left| \Phi^C(x) - \left( \frac{1}{2} - \frac{1}{\sqrt{2\pi}} x \right) \right| \leq |x^3|/15.$$

568 *Proof of Lemma 20.* A third order Taylor expansion shows the error is at most

$$|x^3| \cdot \frac{\sup_{|y| \leq 1} |(\Phi^C)'''(y)|}{6}.$$

569 For  $|y| \leq 1$  we easily compute

$$|(\Phi^C)'''(y)| = \frac{|y^2 - 1| e^{-y^2/2}}{\sqrt{2\pi}} \leq 1/\sqrt{2\pi} \leq 2/5. \quad \square$$

570 **Lemma 21.** If  $X$  is  $K$ -sub-gaussian, then for any event  $E$  and any  $\mathbb{P}(E) \geq a > 0$ , we have

$$\begin{aligned} \mathbb{E}[X^2 1_E] &\leq K^2 \Pr(E) \log(2/a) + K^2 a, \\ \mathbb{E}[X 1_E] &\leq O(\Pr(E) \log(1/a)). \end{aligned} \quad (6)$$

571 *Proof of Lemma 21.* We prove both estimates using the tail-sum formula. For the truncated second  
 572 moment,

$$\begin{aligned}
 \mathbb{E}[X^2 1_E] &= \int_0^\infty \Pr(|X^2 1_E| \geq t) dt \\
 &\leq \int_0^\infty \min(\Pr(E), \Pr(X^2 \geq t)) dt \\
 &\leq \int_0^\infty \min(\Pr(E), 2e^{-t/K^2}) dt \\
 &\leq \Pr(E) \log(2/a) K^2 + \int_{\log(2/a) K^2}^\infty 2e^{-t/K^2} dt \\
 &= K^2 \Pr(E) \log(2/a) + K^2 a.
 \end{aligned}$$

573 Similarly for the truncated first moment,

$$\begin{aligned}
 \mathbb{E}[X 1_E] &= \int_0^\infty \Pr(|X 1_E| \geq t) dt \\
 &\leq \int_0^\infty \min(\Pr(E), \Pr(X \geq t)) dt \\
 &\leq \int_0^\infty \min(\Pr(E), 2e^{-t^2/K^2}) dt \\
 &\leq \Pr(E) \sqrt{\log(3/a)} K + \int_{\sqrt{\log(3/a)} K}^\infty 2e^{-t^2/K^2} dt \\
 &= O(\Pr(E) \log(1/a)). \quad \square
 \end{aligned}$$

574 *Proof of Lemma 14.* Let  $d\mu_X$  be the law of  $X$  and  $d\mu_{X|r>0}$  be the conditional law of  $X$  given the  
 575 event  $r > 0$ . Then by Bayes rule,

$$\begin{aligned}
 d\mu_{X|r>0}(x) &= \frac{\Pr(r > 0 \mid X = x) d\mu_X(x)}{\Pr(r > 0)} \\
 &= \frac{\Pr(N(\epsilon x, \sigma^2) > 0) d\mu_X(x)}{\Pr(r > 0)} \\
 &= \frac{\Phi^C(-\epsilon x/\sigma) d\mu_X(x)}{\Pr(r > 0)}.
 \end{aligned}$$

576 Note that

$$\mathbb{E}[X \mid r > 0] = \int_{-\infty}^\infty x d\mu_{X|r>0}(x) = \frac{1}{\Pr(r > 0)} \int_{-\infty}^\infty x \Phi^C(-\epsilon x/\sigma) d\mu_X(x).$$

577 Since  $\Pr(r > 0) \leq 1$  it suffices to lower-bound the latter integral by a suitable positive value. As

578 long as  $\epsilon/\sigma \leq \delta_{L14} \leq \sqrt{\frac{1}{4\sigma_X^2 \sqrt{2\pi}}}$ , we have

$$\begin{aligned}
 &\int_{-\infty}^\infty x \Phi^C(-\epsilon x/\sigma) d\mu_X(x) \\
 &= \int_{-\infty}^\infty x \left( \frac{1}{2} + \frac{1}{\sqrt{2\pi}} \frac{\epsilon x}{\sigma} \right) d\mu_X(x) \\
 &\quad + \int_{-\infty}^\infty x \left( \Phi^C\left(\frac{-\epsilon x}{\sigma}\right) - \frac{1}{2} - \frac{1}{\sqrt{2\pi}} \frac{\epsilon x}{\sigma} \right) d\mu_X(x) \\
 &= \left( \frac{\epsilon \mathbb{E}[X^2]}{\sigma \sqrt{2\pi}} + \int_{-\infty}^\infty x \left( \Phi^C\left(\frac{-\epsilon x}{\sigma}\right) - \frac{1}{2} - \frac{1}{\sqrt{2\pi}} \frac{\epsilon x}{\sigma} \right) d\mu_X(x) \right) \quad [\mathbb{E}[X] = 0] \\
 &\geq \left( \frac{\epsilon \sigma_X^2}{\sigma \sqrt{2\pi}} - \frac{2 \mathbb{E}[X^4] \epsilon^3}{\sigma^3} \right) \quad [\text{Inequality (8) Below}] \\
 &\geq \frac{\epsilon \sigma_X^2}{2\sigma \sqrt{2\pi}}. \quad \left[ \frac{\epsilon^2}{\sigma^2} \leq \frac{\sigma_X^2}{4 \mathbb{E}[X^4] \sqrt{2\pi}} \right]
 \end{aligned}$$



579 Above we used the following estimate (8). For sufficiently small  $\delta_{L14}$ ,

$$\begin{aligned}
& \int_{-\infty}^{\infty} x \left( \Phi^C\left(\frac{-\epsilon x}{\sigma}\right) - \frac{1}{2} - \frac{1}{\sqrt{2\pi}} \frac{\epsilon x}{\sigma} \right) d\mu_X(x) \\
&= \int_{|x| \leq \frac{\sigma}{10\epsilon}} x \left( \Phi^C\left(\frac{-\epsilon x}{\sigma}\right) - \frac{1}{2} - \frac{1}{\sqrt{2\pi}} \frac{\epsilon x}{\sigma} \right) d\mu_X(x) + \int_{|x| > \frac{\sigma}{10\epsilon}} x \left( \Phi^C\left(\frac{-\epsilon x}{\sigma}\right) - \frac{1}{2} - \frac{1}{\sqrt{2\pi}} \frac{\epsilon x}{\sigma} \right) d\mu_X(x) \\
&\geq \int_{|x| \leq \frac{\sigma}{10\epsilon}} x \left( \Phi^C\left(\frac{-\epsilon x}{\sigma}\right) - \frac{1}{2} - \frac{1}{\sqrt{2\pi}} \frac{\epsilon x}{\sigma} \right) d\mu_X(x) - \int_{|x| > \frac{\sigma}{10\epsilon}} \left( \frac{|x|}{2} + \frac{\epsilon x^2}{\sigma\sqrt{2\pi}} \right) d\mu_X(x) \\
&\geq - \int_{|x| \leq \frac{\sigma}{10\epsilon}} |x| \left| \frac{\epsilon x}{\sigma} \right|^3 d\mu_X(x) - \int_{|x| > \frac{\sigma}{10\epsilon}} \left( \frac{|x|}{2} + \frac{\epsilon x^2}{\sigma\sqrt{2\pi}} \right) d\mu_X(x) \quad [\text{Lemma 20}] \\
&= - \frac{\mathbb{E}[X^4]\epsilon^3}{\sigma^3} - \int_{|x| > \frac{\sigma}{10\epsilon}} \left( \frac{|x|}{2} + \frac{\epsilon x^2}{\sigma\sqrt{2\pi}} \right) d\mu_X(x) \\
&\geq - \frac{\mathbb{E}[X^4]\epsilon^3}{\sigma^3} - \int_{|x| > \frac{\sigma}{10\epsilon}} x^2 d\mu_X(x) \quad [\text{if } \epsilon/\sigma \leq \delta_{L14} \leq 1/10] \\
&\geq - \frac{\mathbb{E}[X^4]\epsilon^3}{\sigma^3} - (K^2 \Pr(E) \log(2/a) + K^2 a) \quad [\text{Lemma 21, } E := \{|x| > \frac{\sigma}{10\epsilon}\}, a = 2e^{-\frac{\sigma^2}{100\epsilon^2 K^2}}] \\
&\geq - \frac{\mathbb{E}[X^4]\epsilon^3}{\sigma^3} - 2K^2 e^{-\frac{\sigma^2}{100K^2 \epsilon^2}} \left( \frac{\sigma^2}{100\epsilon^2 K^2} + 1 \right) \quad [\Pr(E) \leq 2e^{-\sigma^2/(100\epsilon^2 K^2)}] \\
&\geq - \frac{2\mathbb{E}[X^4]\epsilon^3}{\sigma^3} \quad [2K^2 e^{-\frac{\sigma^2}{100K^2 \epsilon^2}} \left( \frac{\sigma^2}{100\epsilon^2 K^2} + 1 \right) \leq \frac{(\sigma_X^2)^2 \epsilon^3}{\sigma^3} \leq \frac{\mathbb{E}[X^4]\epsilon^3}{\sigma^3}] \\
&\quad (8)
\end{aligned}$$

580 where the second to last line holds for sufficiently small  $\epsilon/\sigma$ .  $\square$

## 581 G.2 Proof of Lemma 15

582 *Proof of Lemma 15.* First, we observe that  $\mathbb{E}[Y \mid r > 0] = \frac{\mathbb{E}[Y\mathbf{1}\{r>0\}]}{\mathbb{P}(r>0)}$ . If  $\frac{\epsilon}{\sigma} K \sqrt{\log(4)} \leq 1/2$ , we  
583 also have that

$$\begin{aligned}
& \Pr(r > 0) \\
&\geq \Pr(r > 0 \mid X \geq -K\sqrt{\log(4)}) \Pr(X \geq -K\sqrt{\log(4)}) \\
&\geq \Phi^C\left(\frac{\epsilon}{\sigma} K \sqrt{\log(4)}\right) \Pr(X \geq -K\sqrt{\log(4)}) \\
&\geq \Phi^C\left(\frac{\epsilon}{\sigma} K \sqrt{\log(4)}\right) \left(1 - 2e^{-K^2 \log(4)/K^2}\right) \\
&\geq \Phi^C(1/2) 1/2 \quad \left[\frac{\epsilon}{\sigma} K \sqrt{\log(4)} \leq 1/2\right] \\
&\geq 1/8.
\end{aligned}$$

584 Therefore, it is sufficient to upper bound  $|\mathbb{E}[Y\mathbf{1}\{r > 0\}]|$ . By law of total expectation,

$$\mathbb{E}[Y\mathbf{1}\{r > 0\}] = \mathbb{E}[\mathbb{E}[Y\mathbf{1}\{r > 0\} \mid X]] = \mathbb{E}\left[\mathbb{E}[Y \mid X] \mathbb{P}(Z > -\frac{\epsilon}{\sigma} X)\right].$$

585 Define  $Q(X) = \mathbb{E}[Y \mid X]$ . Because  $Y$  is sub-gaussian, the random variable  $Q(X)$  must also be sub-  
586 gaussian with parameter  $\sqrt{18}K$  (see [Van Handel, 2014, Exercise 3.1]). Furthermore,  $\mathbb{E}[Q(X)] =$   
587  $\mathbb{E}[\mathbb{E}[Y \mid X]] = \mathbb{E}[Y] = 0$ . Now, we have the following

$$\begin{aligned}
& |\mathbb{E}[Y\mathbf{1}\{r > 0\}]| \\
&= \left| \mathbb{E}\left[\mathbb{E}[Y \mid X] \mathbb{P}(Z > -\frac{\epsilon}{\sigma} X)\right] \right| \\
&= \left| \int_{-\infty}^{\infty} Q(x) \Phi^C\left(-\frac{\epsilon x}{\sigma}\right) d\mu_X(x) \right| \\
&= \left| \int_{-\infty}^{\infty} \frac{1}{2} Q(x) d\mu_X(x) + \int_{-\infty}^{\infty} Q(x) \left( \Phi^C\left(-\frac{\epsilon x}{\sigma}\right) - \frac{1}{2} \right) d\mu_X(x) \right|
\end{aligned}$$

$$\begin{aligned}
&= \left| \frac{1}{2} \mathbb{E}[Q(X)] + \int_{-\infty}^{\infty} Q(x) \left( \Phi^C\left(-\frac{\epsilon x}{\sigma}\right) - \frac{1}{2} \right) d\mu_X(x) \right| \\
&= \left| \int_{-\infty}^{\infty} Q(x) \left( \Phi^C\left(-\frac{\epsilon x}{\sigma}\right) - \frac{1}{2} \right) d\mu_X(x) \right| \\
&\leq \int_{|x| \leq \frac{\sigma}{10\epsilon}} |Q(x)| \left( \frac{|\epsilon x|}{\sigma\sqrt{2\pi}} + \left| \frac{\epsilon x}{\sigma} \right|^3 \right) d\mu_X(x) \\
&\quad + \int_{|x| > \frac{\sigma}{10\epsilon}} Q(x) \left( \Phi^C\left(-\frac{\epsilon x}{\sigma}\right) - \frac{1}{2} \right) d\mu_X(x) \quad [\text{Lemma 20}] \\
&\leq \frac{\epsilon}{\sigma} \int_{-\infty}^{\infty} |Q(x)| \left( \frac{|x|}{\sqrt{2\pi}} + |x^3| \right) d\mu_X(x) + \frac{1}{2} \int_{|x| > \frac{\sigma}{10\epsilon}} |Q(x)| d\mu_X(x) \quad [\epsilon/\sigma \leq 1] \\
&\leq \frac{\epsilon}{\sigma} \sqrt{\mathbb{E}[Q(X)^2] \mathbb{E} \left[ \left( \frac{|x|}{\sqrt{2\pi}} + |x^3| \right)^2 \right]} + \frac{1}{2} O \left( \frac{\sigma}{10\epsilon K} (2e^{-\frac{\sigma^2}{100\epsilon^2 K^2}}) \right) \quad [\text{Lemma 21 Equation (6)}] \\
&\leq O(\epsilon/\sigma).
\end{aligned}$$

588 where in the second to last line we used that  $\Pr(|X| > \frac{\sigma}{10\epsilon}) \leq 2e^{-\frac{\sigma^2}{100\epsilon^2 K^2}}$  and that  $Q(X)$  is  
589  $K\sqrt{18}$ -sub-gaussian. The last line again uses that both  $X$  and  $Q(X)$  are sub-gaussian.

590 Therefore, we have shown that

$$|\mathbb{E}[Y \mid r > 0]| = \left| \frac{\mathbb{E}[Y \mathbf{1}\{r > 0\}]}{\mathbb{P}(r > 0)} \right| \leq 8 |\mathbb{E}[Y \mathbf{1}\{r > 0\}]| = O(\epsilon/\sigma).$$

591 By symmetric arguments to the ones above, we have the same bound on  $|\mathbb{E}[Y \mid r \leq 0]|$ .  $\square$

## 592 H Proof of Lemma 16

593 *Proof of Lemma 16.* Fix any  $\mathbf{v}$  such that  $\|\mathbf{v}\| = 1$ . First, we will show that

$$\Pr(|\mathbf{v} \cdot (\mathbf{Z}(\mathbf{Y}) - \mathbf{X})| \geq c_d/2) \leq \epsilon_d/2.$$

594 To do this, we will show that  $\langle \mathbf{v}, (\mathbf{Z}(\mathbf{Y}) - \mathbf{X}) \rangle$  is a sub-gaussian random variable. Let  $\hat{\mathbf{X}}$  be a draw  
595 from the distribution of  $\mathbf{X} \mid \mathbf{Y}$ . Then we have that

$$\langle \mathbf{v}, \hat{\mathbf{X}} - \mathbf{X} \rangle = \langle \mathbf{v}, \hat{\mathbf{X}} - \mathbf{Y} \rangle + \langle \mathbf{v}, \mathbf{Y} - \mathbf{X} \rangle.$$

596 By standard properties of posterior samples,  $\langle \mathbf{v}, \hat{\mathbf{X}} - \mathbf{Y} \rangle$  and  $\langle \mathbf{v}, \mathbf{Y} - \mathbf{X} \rangle$  are identically distributed  
597 with distribution  $N(0, \sigma^2)$  for  $\sigma^2 = \sum_{i=1}^d \mathbf{v}_i^2 s_i$  (here one averages over all randomness). Therefore,  
598 we have that

$$\begin{aligned}
&\mathbb{E}[\exp(t\langle \mathbf{v}, \mathbf{Z}(\mathbf{Y}) - \mathbf{X} \rangle)] \\
&= \mathbb{E}[\exp(t\langle \mathbf{v}, \mathbb{E}[\hat{\mathbf{X}}] - \mathbf{X} \rangle)] \\
&\leq \mathbb{E}[\exp(t\langle \mathbf{v}, \hat{\mathbf{X}} - \mathbf{X} \rangle)] \quad [\text{Jensen}] \\
&= \mathbb{E}[\exp(t\langle \mathbf{v}, \hat{\mathbf{X}} - \mathbf{Y} + \mathbf{Y} - \mathbf{X} \rangle)] \\
&\leq \sqrt{\mathbb{E}[\exp(2t\langle \mathbf{v}, \hat{\mathbf{X}} - \mathbf{Y} \rangle)] \mathbb{E}[\exp(2t\langle \mathbf{v}, \mathbf{Y} - \mathbf{X} \rangle)]} \quad [\text{Cauchy-Schwarz}] \\
&\leq e^{2t^2\sigma^2}.
\end{aligned}$$

599 Therefore,  $\langle \mathbf{v}, (\mathbf{Z}(\mathbf{Y}) - \mathbf{X}) \rangle$  is sub-gaussian and satisfies the tail bound

$$\Pr(|\langle \mathbf{v}, (\mathbf{Z}(\mathbf{Y}) - \mathbf{X}) \rangle| > t) \leq 2e^{-t^2/(8\sigma^2)}.$$

600 Taking  $t = c_d/2$ , because  $\sigma^2 = \sum_{i=0}^d \mathbf{v}_i^2 s_i \leq \max_i s_i \leq \frac{c_d^2/32}{\log(4/\epsilon_d)}$ , we have that

$$\Pr(|\langle \mathbf{v}, (\mathbf{Z}(\mathbf{Y}) - \mathbf{X}) \rangle| > \frac{c_d}{2}) \leq 2e^{-c_d^2/(32\sigma^2)} = \epsilon_d/2. \quad (9)$$

601 Now, we can prove the desired result that

$$\begin{aligned}
& \mathbb{E}[(\langle \mathbf{Z}(\mathbf{Y}), \mathbf{v} \rangle)^+] \\
& \geq \mathbb{E} \left[ (\langle \mathbf{Z}(\mathbf{Y}), \mathbf{v} \rangle)^+ \mid |\langle \mathbf{v}, (\mathbf{Z}(\mathbf{Y}) - \mathbf{X}) \rangle| \leq \frac{c_d}{2}, \langle \mathbf{X}, \mathbf{v} \rangle \geq c_d \right] \Pr \left( |\langle \mathbf{v}, (\mathbf{Z}(\mathbf{Y}) - \mathbf{X}) \rangle| \leq \frac{c_d}{2}, \langle \mathbf{X}, \mathbf{v} \rangle \geq c_d \right) \\
& \geq \mathbb{E} \left[ \frac{c_d}{2} \mid |\langle \mathbf{v}, (\mathbf{Z}(\mathbf{Y}) - \mathbf{X}) \rangle| \leq \frac{c_d}{2}, \langle \mathbf{X}, \mathbf{v} \rangle \geq c_d \right] \Pr \left( |\langle \mathbf{v}, (\mathbf{Z}(\mathbf{Y}) - \mathbf{X}) \rangle| \leq \frac{c_d}{2}, \langle \mathbf{X}, \mathbf{v} \rangle \geq c_d \right) \\
& = \frac{c_d}{2} \Pr \left( |\langle \mathbf{v}, (\mathbf{Z}(\mathbf{Y}) - \mathbf{X}) \rangle| \leq \frac{c_d}{2}, \langle \mathbf{X}, \mathbf{v} \rangle \geq c_d \right) \\
& \geq \frac{c_d}{2} \left( \Pr(\langle \mathbf{X}, \mathbf{v} \rangle \geq c_d) - \Pr \left( |\langle \mathbf{v}, (\mathbf{Z}(\mathbf{Y}) - \mathbf{X}) \rangle| > \frac{c_d}{2} \right) \right) \\
& \geq \frac{c_d}{2} \left( \epsilon_d - \frac{\epsilon_d}{2} \right) \quad [\text{Eq (9) and lemma assum}] \\
& = \frac{c_d \epsilon_d}{4}. \quad \square
\end{aligned}$$

## 602 H.1 Proof of Lemma 13

603 *Proof of Lemma 13.* Let  $B$  be a Bernoulli random variable such that  $\Pr(B = 1) = \epsilon$  and let  
604  $Z \sim N(0, 1)$  be independent of  $B$  and  $X$ . Then we can write  $R \sim X \cdot B + Z$ .

605 Then we have that

$$\begin{aligned}
& \mathbb{E}[X \mid R > 0] \\
& = \mathbb{E}[X \mid R > 0, B = 1] \Pr(B = 1 \mid R > 0) + \mathbb{E}[X \mid R > 0, B = 0] \Pr(B = 0 \mid R > 0) \\
& = \mathbb{E}[X \mid X + Z > 0] \Pr(B = 1 \mid R > 0) \\
& = \mathbb{E}[X \mid X + Z > 0] \frac{\Pr(R > 0 \mid B = 1) \Pr(B = 1)}{\Pr(R > 0)} \\
& \geq \mathbb{E}[X \mid X + Z > 0] \Pr(R > 0 \mid B = 1) \Pr(B = 1) \\
& = \mathbb{E}[X \mid X + Z > 0] \Pr(X + Z > 0) \epsilon. \tag{10}
\end{aligned}$$

606 Next, we need to lower bound  $\mathbb{E}[X \mid X + Z > 0] \Pr(X + Z > 0)$ . Applying Baye's rule gives

$$\begin{aligned}
& \mathbb{E}[X \mid X + Z > 0] \Pr(X + Z > 0) \\
& = \Pr(X + Z > 0) \int_{-\infty}^{\infty} x d\mu_{X \mid X+Z>0}(x) \\
& = \int_{-\infty}^{\infty} x (\Phi^C(-x)) d\mu_X(x) \\
& = \int_{-\infty}^{\infty} x (\Phi^C(-x) - 1/2) d\mu_X(x) \quad [\mathbb{E}[X] = 0]
\end{aligned}$$

Note that  $(\Phi^C(-x) - 1/2)$  has the same sign as  $x$  and has magnitude increasing in  $|x|$ . Therefore,

$$\begin{aligned}
& \geq \int_{x \geq \frac{\sigma_X}{\sqrt{10}}} \frac{\sigma_X}{\sqrt{10}} \mathbb{P} \left( 0 \leq Z \leq \frac{\sigma_X}{\sqrt{10}} \right) d\mu_X(x) + \int_{x \leq -\frac{\sigma_X}{\sqrt{10}}} \frac{\sigma_X}{\sqrt{10}} \mathbb{P} \left( 0 \leq Z \leq \frac{\sigma_X}{\sqrt{10}} \right) d\mu_X(x) \\
& = \frac{\sigma_X \mathbb{P}(0 \leq Z \leq \frac{\sigma_X}{\sqrt{10}})}{\sqrt{10}} \mathbb{P}(|X| > \frac{\sigma_X}{\sqrt{10}}) \\
& \geq \frac{\sigma_X \mathbb{P}(0 \leq Z \leq \frac{\sigma_X}{\sqrt{10}})}{\sqrt{10}} \left( \frac{4\sigma_X^2}{5K^2 \log \left( \frac{20K^2}{\sigma_X^2} \right)} \right). \quad [\text{Equation (12) below}] \\
& \geq \Omega(\sigma_X^5). \tag{11}
\end{aligned}$$

607 Combining Equations (10) and (11) gives the desired result of the lemma.

608 It remains to show the lower bound on  $\mathbb{P}(|X| > \frac{\sigma_X}{\sqrt{10}})$  used in the penultimate line above.

609 Define  $a = K^2 \log \left( \frac{20K^2}{\sigma_X^2} \right) \geq \sigma_X^2 \log(10)/2 > \sigma_X^2/10$  (using Equation (2)). Next, we observe that

$$\begin{aligned}
& \mathbb{E}[X^2] \\
&= \int_0^\infty \mathbb{P}(X^2 > t) dt \\
&= \int_0^\infty \mathbb{P}(X > \sqrt{t}) dt \\
&= \int_0^{\sigma_X^2/10} \mathbb{P}(X > \sqrt{t}) dt + \int_{\sigma_X^2/10}^a \mathbb{P}(X > \sqrt{t}) dt + \int_a^\infty \mathbb{P}(X > \sqrt{t}) dt \\
&\leq \sigma_X^2/10 + \int_{\sigma_X^2/10}^a \mathbb{P}(X > \sqrt{t}) dt + \int_a^\infty 2e^{-t/K^2} dt \\
&= \sigma_X^2/10 + \int_{\sigma_X^2/10}^a \mathbb{P}(X > \sqrt{t}) dt + 2K^2 e^{-a/K^2} \\
&= \sigma_X^2/5 + \int_{\sigma_X^2/10}^a \mathbb{P}(X > \sqrt{t}) dt \quad [\text{Def of } a] \\
&\leq \sigma_X^2/5 + \left( a - \frac{\sigma_X^2}{10} \right) \mathbb{P} \left( X > \frac{\sigma_X}{\sqrt{10}} \right). \quad [\mathbb{P}(X > \sqrt{t}) \text{ monotone decr.}]
\end{aligned}$$

610 Since  $\mathbb{E}[X^2] = \sigma_X^2$ , this implies that

$$\left( a - \frac{\sigma_X^2}{10} \right) \mathbb{P} \left( X > \frac{\sigma_X}{\sqrt{10}} \right) \geq \frac{4\sigma_X^2}{5}.$$

611 Therefore, we can conclude that

$$\mathbb{P} \left( X > \frac{\sigma_X}{\sqrt{10}} \right) \geq \frac{4\sigma_X^2/5}{a - \sigma_X^2/10} \geq \frac{4\sigma_X^2/5}{a} = \frac{4\sigma_X^2}{5K^2 \log \left( \frac{20K^2}{\sigma_X^2} \right)}. \quad (12)$$

612 By symmetry, identical logic as above gives the desired upper bound on  $\mathbb{E}[X \mid R \leq 0]$ .  $\square$

## 613 I Proof of Proposition 10

614 *Proof of Proposition 10.* We first show that  $\mathbf{A}^{(t)}$  on Line 6 satisfies  $\mathbf{A}^{(t)} \in S^\perp$  when  $\Psi = 1$ . Recall  
615  $\mathbf{x}^*$  defined as  $x_\ell^* = \langle \ell^*, \mathbf{w}_\ell \rangle$  and recall that  $\mathbf{z}(\mathbf{y}) = \mathbb{E}[\mathbf{x}^* \mid \hat{\mathbf{y}} = \mathbf{y}]$ . By construction,

$$\begin{aligned}
& \mathbb{E}[\mathbf{x}^* \mid \Psi = 1] \\
&= \int \mathbb{E}[\mathbf{x}^* \mid \Psi = 1, \hat{\mathbf{y}} = \mathbf{y}] d\mu_{\hat{\mathbf{y}} \mid \Psi=1}(\mathbf{y}) \\
&= \int \mathbb{E}[\mathbf{x}^* \mid \hat{\mathbf{y}} = \mathbf{y}] \frac{\Pr(\Psi = 1 \mid \hat{\mathbf{y}} = \mathbf{y})}{\Pr(\Psi = 1)} d\mu_{\hat{\mathbf{y}}}(\mathbf{y}) \quad [\Psi = 1 \text{ is a function of } \hat{\mathbf{y}}] \\
&= \frac{1}{\Pr(\Psi = 1)} \int \mathbb{E}[\mathbf{x}^* \mid \hat{\mathbf{y}} = \mathbf{y}] f(\mathbf{z}(\mathbf{y})) d\mu_{\hat{\mathbf{y}}}(\mathbf{y}) \\
&= \frac{1}{\Pr(\Psi = 1)} \int \mathbf{z}(\mathbf{y}) f(\mathbf{z}(\mathbf{y})) d\mu_{\hat{\mathbf{y}}}(\mathbf{y}) \\
&= \frac{1}{\Pr(\Psi = 1)} \mathbb{E}[\mathbf{z}(\hat{\mathbf{y}}) f(\mathbf{z}(\hat{\mathbf{y}}))] \\
&= 0. \quad [\text{Definition of } f]
\end{aligned}$$

616 Because  $x_\ell^* = \langle \ell^*, \mathbf{w}_\ell \rangle$  for  $\ell \leq \ell_\lambda$ , this implies that  $\mathbb{E}[\langle \ell^*, \mathbf{w}_\ell \rangle \mid \Psi = 1] = 0$  for  $\ell \leq \ell_\lambda$ . Therefore,  
617 we must have that  $\mathbb{E}[\ell^* \mid \Psi = 1] \in S^\perp$ . By construction of  $\mathbf{A}^{(t)}$  in Line 6, this implies that  
618  $\mathbf{A}^{(t)} \in S^\perp$  when  $\Psi = 1$ .

619 Define

$$\mathbf{A} = \begin{cases} \frac{\mathbb{E}[\ell^* | \Psi=1]}{\|\mathbb{E}[\ell^* | \Psi=1]\|_2} & \text{if } \mathbb{E}[\ell^* | \Psi = 1] \neq 0 \\ \mathbf{w}_{\ell_\lambda+1} & \text{otherwise,} \end{cases}$$

620 in other words  $\mathbf{A}$  is equal to  $\mathbf{A}^{(t)}$  when  $\Psi = 1$ .

621 By the choice of  $f$ , we have that  $\mathbb{P}(\Psi = 1) \geq \frac{\epsilon_d c_d}{16 \max(\|\mathbb{E}[\mathbf{z}(\hat{\mathbf{y}})]\|, 1)} \geq \frac{\epsilon_d c_d}{16(K\sqrt{\pi}+1)}$ , where in the last  
622 line we used that Equation (B) implies

$$\max(\|\mathbb{E}[\mathbf{z}(\hat{\mathbf{y}})]\|, 1) = \max(\|\mathbb{E}[\mathbf{x}^*]\|, 1) \leq \max(\|\mathbb{E}[\ell^*]\|, 1) \leq \max(K\sqrt{\pi}, 1) \leq K\sqrt{\pi} + 1.$$

623 By construction, we therefore have that for any realization of  $\mathbf{z}(\hat{\mathbf{y}})$ , the probability that  $R = r^{(t)} =$   
624  $\langle \ell^*, \mathbf{A}^{(t)} \rangle + w_t = \langle \ell^*, \mathbf{A} \rangle + w_t$  is exactly  $\frac{\epsilon_d c_d}{16(K\sqrt{\pi}+1)}$  and otherwise  $R \sim N(0, 1)$ .

625 We can now apply Lemma 13 with  $X = \langle \ell^*, \mathbf{A} \rangle$ , and  $\epsilon = \frac{\epsilon_d c_d}{16(K\sqrt{\pi}+1)}$  to get that either  $\mathbf{a} = \mathbf{w}_{\ell_\lambda+1}$   
626 or

$$|\langle \mathbf{A}, \mathbf{a} \rangle| = |\langle \mathbf{A}, \mathbb{E}[\ell^* | 1_{R>0}] \rangle| = |\mathbb{E}[\langle \ell^*, \mathbf{A} \rangle | 1_{R>0}]| \geq \frac{c_{L13} \epsilon_d c_d \text{Var}(\langle \ell^*, \mathbf{A} \rangle)^{2.5}}{16(K\sqrt{\pi}+1)} \geq \frac{c_{L13} \epsilon_d c_d c_v^{2.5}}{16(K\sqrt{\pi}+1)},$$

627 where in the last inequality we used Assumption 2.

628 Because  $\mathbf{A} \in S^\perp$  and  $\|\mathbf{A}\| = 1$ , the previous equation implies the desired result that  $\|\mathcal{P}_{S^\perp}(\mathbf{a})\| \geq$   
629  $\frac{c_{L13} \epsilon_d c_d c_v^{2.5}}{16(K\sqrt{\pi}+1)}$ .  $\square$

## 630 J Proof of Proposition 11

631 *Proof of Proposition 11.* The first step is to rewrite  $R$  from Algorithm 6 Line 7 so that we can apply  
632 Lemmas 14 and 15.

633 Define

$$W := \sum_{t'=t}^{t+L-1} \left( w_{t'} - \sum_{k=1}^j (c_k q_k^{t'} - c_k \langle \mathbf{v}_k, \ell^* \rangle) \right) = \sum_{t'=t}^{t+L-1} \left( w_{t'} - \sum_{k=1}^j c_k q_k^{t'} \right) + L \sum_{k=1}^j c_k \langle \mathbf{v}_k, \ell^* \rangle.$$

634 Note that  $W$  is normally distributed with mean 0 and variance  $\sigma_W^2 := L(1 + \sum_{k=1}^j c_k^2)$ . By  
635 construction, we can rewrite  $R$  as

$$\begin{aligned} R &= \sum_{t'=t}^{t+L-1} \left( r^{(t')} - \sum_{k=1}^j c_k q_k^{t'} \right) \\ &= \sum_{t'=t}^{t+L-1} \left( (\langle \mathbf{a}, \ell^* \rangle + w_{t'}) - \sum_{k=1}^j c_k q_k^{t'} \right) \\ &= \sum_{t'=t}^{t+L-1} \langle \mathbf{a}, \ell^* \rangle - L \sum_{k=1}^j c_k \langle \mathbf{v}_k, \ell^* \rangle + W \\ &= L \langle \mathbf{a}, \ell^* \rangle - L \langle \mathcal{P}_S(\mathbf{a}), \ell^* \rangle + W & [\text{Lemma 17 implies } \mathcal{P}_S(\mathbf{a}) = \sum_{k=1}^j c_k \mathbf{v}_k] \\ &= L \langle (\mathbf{a} - \mathcal{P}_S(\mathbf{a})), \ell^* \rangle + W \\ &= L \langle \mathcal{P}_{S^\perp}(\mathbf{a}), \ell^* \rangle + W \\ &= L \|\mathcal{P}_{S^\perp}(\mathbf{a})\| \langle \mathbf{x}, \ell^* \rangle + W. \end{aligned} \tag{13}$$

636 Therefore,  $R$  is exactly in the form necessary to apply Lemmas 14 and 15. In order to apply these  
637 lemmas, we need that  $\frac{L \|\mathcal{P}_{S^\perp}(\mathbf{a})\|}{\sigma_W} \leq \delta_{L14}$  and  $\frac{L \|\mathcal{P}_{S^\perp}(\mathbf{a})\|}{\sigma_W} \leq \delta_{L15}$  respectively.

638 To see this, note that  $\mathcal{P}_{S^\perp}(\mathbf{a}) \leq \sqrt{\lambda}$  (as otherwise ExponentialGrowth would not have been called),  
 639 and therefore

$$\begin{aligned}
 \frac{L \|\mathcal{P}_{S^\perp}(\mathbf{a})\|}{\sigma_W} &\leq \frac{L\sqrt{\lambda}}{\sqrt{L(1 + \sum_{k=1}^j c_k^2)}} \\
 &= \sqrt{\frac{4\lambda d(\mathbb{E}[\ell^*_{\mathbf{1}}] + 1)^2}{c_{L14}^2}} \\
 &\leq \sqrt{\frac{4\lambda d(K\sqrt{\pi} + 1)^2}{(c_v/\sqrt{8\pi})^2}} \quad [\text{Equation (B), Assum 2}] \\
 &\leq \min(\delta_{L14}, \delta_{L15}, 1/c_{L15}), \tag{14}
 \end{aligned}$$

640 where in the last line we used  $\lambda \leq \min(\delta_{L14}, \delta_{L15}, 1/c_{L15})^2 \frac{(c_v/\sqrt{8\pi})^2}{4d(K\sqrt{\pi}+1)^2}$  by our assumption on  $\lambda$ .

641 Applying Lemmas 14 and 15 gives the following two bounds. Define  $\mathbf{y} = \mathbb{E}[\ell^* \mid 1_{R>0}]$ . The first is a  
 642 lower bound on  $|\langle \mathbf{x}, \mathbf{y} \rangle|$ . Importantly, we can apply Lemma 14 for  $X = \langle \mathbf{x}, \ell^* \rangle$  because of Equations  
 643 (13) and (14).

$$\begin{aligned}
 |\langle \mathbf{x}, \mathbf{y} \rangle| &= |\langle \mathbf{x}, \mathbb{E}[\ell^* \mid 1_{R>0}] \rangle| \\
 &= |\mathbb{E}[\langle \mathbf{x}, \ell^* \rangle \mid 1_{R>0}]| \\
 &\geq \frac{c_{L14} L \|\mathcal{P}_{S^\perp}(\mathbf{a})\|}{\sigma_W} \quad [\text{Lemma 14}] \\
 &= \frac{c_{L14} \sqrt{L} \|\mathcal{P}_{S^\perp}(\mathbf{a})\|}{\sqrt{1 + \sum_{k=1}^j c_k^2}} \\
 &= c_{L14} \sqrt{\frac{4d(\mathbb{E}[\ell^*_{\mathbf{1}}] + 1)^2}{c_{L14}^2}} \|\mathcal{P}_{S^\perp}(\mathbf{a})\| \\
 &= \sqrt{4d(\mathbb{E}[\ell^*_{\mathbf{1}}] + 1)^2} \|\mathcal{P}_{S^\perp}(\mathbf{a})\| \\
 &= 2\sqrt{d}(\mathbb{E}[\ell^*_{\mathbf{1}}] + 1) \|\mathcal{P}_{S^\perp}(\mathbf{a})\|. \tag{15}
 \end{aligned}$$

644 The next equation is an upper bound on  $\|\mathbf{y}_i\|$  for all  $i \in [d]$ :

$$\begin{aligned}
 |\mathbf{y}_i| &= \mathbb{E}[\ell^*_i \mid 1_{R>0}] \\
 &\leq \mathbb{E}[\ell^*_i] + c_{L15} L \|\mathcal{P}_{S^\perp}(\mathbf{a})\| / \sigma_W \quad [\text{Lemma 15}] \\
 &\leq \mathbb{E}[\ell^*_i] + 1. \quad [\text{Equation (14)}]
 \end{aligned}$$

645 Using the above equation, we can bound  $\|\mathbf{y}\|_2$  as follows. Because  $\mathbb{E}[\ell^*_{\mathbf{1}}] \geq \mathbb{E}[\ell^*_i]$  for all  $i$ ,

$$\|\mathbf{y}\|_2 \leq \sqrt{\sum_{i=1}^d (\mathbb{E}[\ell^*_i] + 1)^2} \leq \sqrt{d}(\mathbb{E}[\ell^*_{\mathbf{1}}] + 1).$$

646 Equation (15) implies that  $\mathbf{y} \neq \mathbf{0}$ . This implies by construction that  $\mathbf{b} = \text{Exploit}(1_{R>0}, \mathbf{w}_{\ell_\lambda+1}) =$   
 647  $\frac{\mathbf{y}}{\|\mathbf{y}\|}$ . Putting everything together, we have that

$$|\langle \mathbf{x}, \mathbf{b} \rangle| = \frac{|\langle \mathbf{x}, \mathbf{y} \rangle|}{\|\mathbf{y}\|_2} \geq \frac{2\sqrt{d}(\mathbb{E}[\ell^*_{\mathbf{1}}] + 1) \|\mathcal{P}_{S^\perp}(\mathbf{a})\|}{\sqrt{d}(\mathbb{E}[\ell^*_{\mathbf{1}}] + 1)} \geq 2 \|\mathcal{P}_{S^\perp}(\mathbf{a})\|.$$

648 Finally, because  $\mathbf{x} \in S^\perp$ , this implies the desired result that

$$\|\mathcal{P}_{S^\perp}(\mathbf{b})\| \geq |\langle \mathbf{x}, \mathbf{b} \rangle| \geq 2 \|\mathcal{P}_{S^\perp}(\mathbf{a})\|. \quad \square$$

## K Proof of Theorem 12

*Proof of Theorem 12.* We begin by proving that Algorithm 4 is BIC. There are four places where we set  $\mathbf{A}^{(t)}$ . The first is in the Line 4 of Algorithm 4, where we set  $\mathbf{A}^{(t)} = \mathbf{e}_1$ . This is BIC because we assumed (without loss of generality) that  $\mathbb{E}[\ell^*_i] = 0$  for all  $i > 1$  and  $\mathbb{E}[\ell^*_1] \geq 0$ .

The second place we set  $\mathbf{A}^{(t)}$  is in Line 6 of Algorithm 5. This choice of  $\mathbf{A}^{(t)}$  is BIC with the signal  $\Psi$  by construction and Lemma 6.

The third place we set  $\mathbf{A}^{(t)}$  is in Line 5 of Algorithm 6. In order for this to be BIC, we must show that every input  $\mathbf{a}$  to Algorithm 3 is BIC. The first time Algorithm 6 is used for any fixed value of  $j$ , the input action  $\mathbf{a}$  is the action returned by Algorithm 5. This is BIC for signal  $R$  defined on Line 7 of Algorithm 5 by construction. Each subsequent call to Algorithm 6 for a fixed value of  $j$  uses an action  $\mathbf{a}$  that is returned by the previous call to Algorithm 6. This is BIC for signal  $R$  defined on Line 7 of Algorithm 6.

The final time we set an action is on Line 17 of Algorithm 4. This action is again an action returned by the last call to Algorithm 6, which as argued above is BIC for signal  $R$ .

The rest of the proof will focus on bounding the sample complexity of Algorithm 4.

First, we will bound the number of times the inner while loop (Line 13) calls Algorithm 6 for each value of  $j$ . By Proposition 10, the action returned by Algorithm 5 satisfies  $\|\mathcal{P}_{S^\perp}(\mathbf{a})\| \geq c_{P10} c_v^{2.5} \epsilon_d c_d$ . Furthermore, by Proposition 11,  $\|\mathcal{P}_{S^\perp}(\mathbf{a})\|$  doubles with each call to Algorithm 6. Therefore,  $\|\mathcal{P}_{S^\perp}(\mathbf{a})\| \geq \sqrt{\lambda}$  will be satisfied after at most  $\log_2 \left( \frac{\sqrt{\lambda}}{c_{P10} c_v^{2.5} \epsilon_d c_d} \right) = O \left( \log \left( \frac{1}{c_v \epsilon_d c_d} \right) \right)$  calls to Algorithm 6.

Next we will bound the number of steps in each call to Algorithm 6, which is equivalent to bounding the  $L$  defined on Line 4 of Algorithm 6. To do this, we note that the  $c_i$  in Algorithm 6 are the same as the  $c_i$  in Lemma 17 with  $\epsilon = \lambda$ ,  $\ell = \ell_\lambda$ ,  $\mathbf{u} = \mathcal{P}_{S^\perp}(\mathbf{a})$ , and  $\mathbf{v}_1, \dots, \mathbf{v}_j$ . This implies that

$$\sum_{k=1}^j c_k^2 \leq \frac{1}{\lambda}. \quad [\text{Lemma 17}]$$

Therefore, we can bound  $L$  as follows:

$$\begin{aligned} L &= \frac{4d(\mathbb{E}[\ell^*_1] + 1)(1 + \sum_{k=1}^j c_k^2)}{c_{L14}^2} \\ &\leq \frac{4d(\mathbb{E}[\ell^*_1] + 1)(1 + \frac{1}{\lambda})}{c_{L14}^2} \\ &\leq \frac{4d(K\sqrt{\pi} + 1)(1 + \frac{1}{\lambda})}{c_v^2 / (8\pi)} \quad [\text{Assum 2, Eq (B)}] \\ &= O \left( \frac{d}{\lambda c_v^2} \right). \end{aligned}$$

For each loop of the while loop on Line 8, we also have  $\kappa = O \left( \frac{\log(1/\epsilon_d)}{\lambda c_d^2} + \frac{d}{\lambda c_v^2} \right)$  steps in the loop on Line 16. All together, this gives that each iteration of the loop on Line 8 takes at most

$$O \left( \frac{d \log(\frac{1}{c_v \epsilon_d c_d})}{\lambda c_v^2} + \frac{\log(1/\epsilon_d)}{\lambda c_d^2} \right) = O \left( \log \left( \frac{1}{c_v \epsilon_d c_d} \right) \left( \frac{d}{\lambda c_v^2} + \frac{1}{\lambda c_d^2} \right) \right)$$

steps. Next, we will bound the number of iterations of the while loop on Line 8.

For each  $j$ , we will apply Lemma 8 with  $\epsilon = \lambda$ ,  $\mathbf{u} = \mathbf{v}_{j+1}$ , and the vectors  $\mathbf{v}_1, \dots, \mathbf{v}_j$ . By construction of the algorithm,  $S^\perp$  is non-empty because the algorithm has not yet terminated, and  $\|\mathcal{P}_{S^\perp}(\mathbf{v}_{j+1})\|^2 \geq \lambda$  by the termination condition of the while loop on Line 13 of Algorithm 4. Therefore, this satisfies the assumption of Lemma 8. Define  $\lambda_1^j, \dots, \lambda_d^j$  as the eigenvalues of

680  $\mathbf{M}^j := \sum_{i=1}^j \mathbf{v}_i^{\otimes 2}$  and define  $\ell^j$  as the largest index such that  $\lambda_{\ell^j}^j \geq 200d^3/\lambda^2$  (and  $\ell^j = 0$  if all  
 681 eigenvalues of  $\mathbf{M}^j$  are less than  $200d^3/\lambda^2$ ). Now define

$$\Delta^j = \sum_{i=\ell^j+1}^d \left( \frac{200d^3}{\lambda^2} - \lambda_i \right).$$

682 Note that for any fixed  $i$ , the  $i$ th eigenvalue does not decrease between  $\mathbf{M}^j$  and  $\mathbf{M}^{j+1}$ . Because of  
 683 this monotonicity, Lemma 8 implies that for every round  $j$ , either

$$\ell^{j+1} \geq \ell^j + 1 \quad \text{or} \quad \Delta^{j+1} \leq \Delta^j - \frac{\lambda}{2}.$$

684 Because  $\ell^1 \geq 0$  and  $\Delta^1 \leq \frac{200d^3}{\lambda^2} \cdot d = \frac{200d^4}{\lambda^2}$ , this implies that after  $\frac{200d^4}{\lambda^2} + d$  applications of Lemma  
 685 8, either  $\ell^j = d$  or  $\Delta^j = 0$ . This means that after  $\frac{400d^4}{\lambda^2} + d$  applications of Lemma 8, the smallest  
 686 eigenvalue of  $\mathbf{M}^j$  must be at least  $200d^3/\lambda^2 \geq \lambda$ . However, this means that the algorithm must  
 687 terminate before round  $400d^4/\lambda^3 + d$ . Therefore, the number of iterations of the while loop on Line 8  
 688 is less than  $O(d^4/\lambda^3)$ . Putting everything together, the total number of steps needed for  $\lambda$ -exploration  
 689 is upper bounded by

$$O\left(\log\left(\frac{1}{c_v \epsilon_d c_d}\right) \left(\frac{d}{\lambda c_v^2} + \frac{1}{\lambda c_d^2}\right)\right) \cdot O\left(\frac{d^4}{\lambda^3}\right) = O\left(\log\left(\frac{1}{c_v \epsilon_d c_d}\right) \left(\frac{d^5}{\lambda^4 c_v^2} + \frac{d^4}{c_d^2 \lambda^4}\right)\right). \quad \square$$

## 690 L Proof of Proposition 4

691 *Proof of Proposition 4.* First, for any unit vector  $\mathbf{v}$ , we have  $B_{r/3}(2r\mathbf{v}/3) \subseteq \mathcal{K} \subseteq B_1(0)$ . Therefore

$$\mu(B_{r/3}(2r\mathbf{v}/3)) = \text{Vol}(B_{r/3}(2r\mathbf{v}/3))/\text{Vol}(\mathcal{K}) \geq \text{Vol}(B_{r/3}(2r\mathbf{v}/3))/\text{Vol}(B_1(0)) = (r/3)^d.$$

692 Since  $\langle \mathbf{x}, \mathbf{v} \rangle \geq r/3$  for all  $\mathbf{x} \in B_{r/3}(2r\mathbf{v}/3)$ , this confirms the values  $(c_d, \epsilon_d) = (r/3, (r/3)^d)$ .

693 The bound on  $c_v$  follows by [Sellke, 2023, Lemma 3.2] and Jensen's inequality since  $\mathcal{K}$  has width at  
 694 least  $2r$  in any direction. The bound on  $K$  is trivial since  $2e^{-(t/1.25)^2} \geq 1$  for  $|t| \leq 1$ .  $\square$

## 695 M Proof of Proposition 5

696 We first recall several useful facts on log-concave distributions. Throughout we take  $\mu$  to be  $\alpha$ -log-  
 697 concave and  $\beta$ -log-smooth with mode  $\mathbf{x}^*$  and mean  $\bar{\mathbf{x}}$ , possibly in dimension 1. (The proof will use  
 698 1-dimensional projections of the original measure  $\mu$ .) We will write  $\mathbf{x} \sim \mu$  instead of  $\ell^* \sim \mu$ .

699 **Fact 22** ([Dwivedi et al., 2019, Lemma 5], [Durmus and Moulines, 2019, Theorem 1]). *For  $x \sim \mu$ ,  
 700 we have  $\mathbb{E}[\|x - x^*\|^2] \leq 1/\alpha$  and with probability  $1 - \delta$ :*

$$\|x - x^*\|_2 \leq 2\alpha^{-1/2} \left( 1 + \sqrt{\frac{\log(1/\delta)}{d}} + \sqrt[4]{\frac{\log(1/\delta)}{d}} \right).$$

701 **Fact 23** ([Chewi and Pooladian, 2023, Lemma 2]). *We have the covariance bounds*

$$\frac{I_d}{\alpha d} \succeq \text{Cov}(\mu) \succeq \frac{I_d}{\beta d}. \quad (17)$$

702 **Fact 24.** *Any 1-dimensional projection of  $\mu$  is also  $\alpha d$ -log-concave and  $\beta d$ -log-smooth.*

703 *Proof.* Preservation of strong log-concavity under projection is well known, see e.g. [Saumard and  
 704 Wellner, 2014, Theorem 3.8]. For log-smoothness, supposing for convenience that the projection  
 705 is onto the first coordinate axis, the claim is proved by the following standard computation. With  
 706  $e^{-f(\mathbf{x})}$  the density of  $\mu$  and  $e^{-g(x)}$  the density of the projection of  $\mu$  to the first coordinate axis, one  
 707 may compute as in [Saumard and Wellner, 2014, Proof of Proposition 7.1] that

$$g''(x) = \mathbb{E}^\mu[\partial_{1,1} f(\mathbf{x}) | x_1 = x] - \text{Var}^\mu[\partial_{1,1} f(\mathbf{x}) | x_1 = x] \leq \mathbb{E}^\mu[\partial_{1,1} f(\mathbf{x}) | x_1 = x] \leq \beta d.$$

708 This completes the proof.  $\square$



709 *Proof of Proposition 5.* We have  $c_v \geq \frac{1}{\beta d}$  directly from (17).

710 For  $\epsilon_d$ , let  $\bar{\mathbf{x}}$  be the mean under  $\mu$  and note that from (17), we find

$$\begin{aligned}\|\bar{\mathbf{x}} - \mathbf{x}^*\| &= \sup_{\|\mathbf{w}\|=1} \langle \bar{\mathbf{x}} - \mathbf{x}^*, \mathbf{w} \rangle \\ &= \sup_{\|\mathbf{w}\|=1} \mathbb{E}^{\mathbf{x} \sim \mu} [\langle \mathbf{x} - \mathbf{x}^*, \mathbf{w} \rangle] \\ &\leq \sqrt{\sup_{\|\mathbf{w}\|=1} \mathbb{E}^{\mathbf{x} \sim \mu} [\langle \mathbf{x} - \mathbf{x}^*, \mathbf{w} \rangle^2]} \\ &\leq \sqrt{\langle \text{Cov}(\mu), \mathbf{w}^{\otimes 2} \rangle} \\ &\leq 1/\sqrt{\alpha d}.\end{aligned}$$

711 Fixing a unit vector  $\mathbf{v}$  as in Assumption 2, we consider the projection  $P$  onto the 1-dimensional  
712 subspace spanned by  $\mathbf{v}$ , and let  $P(\mu)$  be the pushforward of  $\mu$  under the projection (to which Fact 24  
713 applies). Identifying  $P(\mathbb{R}^d)$  isometrically with  $\mathbb{R}$ , let  $\hat{x}$  be the mode of  $P(\mu)$ . Then the same argument  
714 as above applies to  $P(\mu)$  shows  $\|P(\bar{\mathbf{x}}) - \hat{x}\| \leq 1/\sqrt{\alpha d}$ , and so

$$\|\hat{x}\| \leq \|\mathbf{x}^*\| + \frac{2}{\sqrt{\alpha d}} \leq \gamma + \frac{2}{\sqrt{\alpha d}}.$$

715 (Note that if  $\bar{\mathbf{x}} = 0$  then this shows  $\|\hat{x}\| \leq 1/\sqrt{\alpha d}$ , which following the arguments below leads to  
716  $\epsilon_d \geq \Omega(1)$  as mentioned below Proposition 5.)

717 Write  $f : \mathbb{R} \rightarrow \mathbb{R}_+$  for the density of  $P(\mu)$ , and  $g(x) = \log f(x)$ . We have  $f'(\hat{x}) = 0$  and so  
718  $g'(\hat{x}) = 0$  also. By Fact 24, we have  $g''(x) \in [-\beta d, -\alpha d]$  for all  $x$ , so for  $x \geq \hat{x}$  we have:

$$g'(x) = g'(x) - g'(\hat{x}) = \int_{\hat{x}}^x g''(y) dy \in [-\beta d(x - \hat{x}), -\alpha d(x - \hat{x})].$$

719 Integrating again, we find

$$g(x) - g(\hat{x}) = \int_{\hat{x}}^x g'(y) dy \in [-\beta d(x - \hat{x})^2/2, -\alpha d(x - \hat{x})^2/2].$$

720 Identical reasoning gives the same conclusion for  $x \leq \hat{x}$ . Translating back to  $f = e^g$ , we conclude  
721 that for each  $x \in \mathbb{R}$ :

$$e^{-\beta d|x - \hat{x}|^2/2} \leq \frac{f(x)}{f(\hat{x})} \leq e^{-\alpha d|x - \hat{x}|^2/2}.$$

722 It follows that for  $\mathbf{x} = \ell^* \sim \mu$  and  $x \sim P(\mu)$ :

$$\Pr[\langle \mathbf{v}, \mathbf{x} \rangle \geq c_d] \geq \Pr[x \geq \gamma + \frac{2}{\sqrt{\alpha d}} + c_d].$$

723 Letting  $J = \gamma + \frac{2}{\sqrt{\alpha d}} + c_d$ , the latter probability is at least

$$\frac{\int_J^\infty e^{-\beta d z^2/2} dz}{\int_{\mathbb{R}} e^{-\alpha d z^2/2} dz} = \sqrt{\alpha/\beta} \cdot \Phi^C(J\sqrt{\beta d}) \geq \frac{J e^{-J^2 \beta d/2} \sqrt{\alpha d}}{(1 + J^2 \beta d) \sqrt{2\pi}}.$$

724 The last inequality follows from the classical bound  $\Phi^C(\kappa) \geq \frac{\varphi(\kappa)\kappa}{1+\kappa^2}$  where  $\varphi$  is the standard Gaussian  
725 density Gordon [1941]. This confirms the value of  $\epsilon_d$ .

726 For  $K$  we consider a similar projection, and note that by Fact 24 and the Bakry-Emery theory for  
727 strongly log-concave measures (see e.g. [Anderson et al., 2010, Lemma 2.3.3]), we have

$$\mathbb{E}[e^{\lambda \langle \mathbf{v}, \mathbf{x} - \bar{\mathbf{x}} \rangle}] \leq e^{\lambda^2 \alpha d/2}, \quad \forall \lambda \in \mathbb{R}.$$

728 Thus with  $J_0 = \gamma + \frac{1}{\sqrt{\alpha d}} \geq \|\langle \bar{\mathbf{x}}, \mathbf{v} \rangle\|$ , we have (using  $\lambda J_0 \leq \frac{1+\lambda^2 J_0^2}{2}$ ):

$$\mathbb{E}[e^{\lambda \langle \mathbf{v}, \mathbf{x} \rangle}] \leq e^{(\lambda^2 \alpha d/2) + \lambda J_0} \leq e^{0.5} \cdot e^{\lambda^2 (J_0^2 + \alpha d)/2} \leq 2e^{\lambda^2 (J_0^2 + \alpha d)/2}.$$

729 It follows by the usual Markov inequality arguments that

$$\Pr[|\langle \mathbf{v}, \mathbf{x} \rangle| \geq t] \leq 4e^{-\frac{t^2}{2(J_0^2 + \alpha d)}}.$$

730 Since probabilities are at most 1 and  $a \leq \sqrt{a}$  for  $a \leq 1$  we find

$$\Pr[|\langle \mathbf{v}, \mathbf{x} \rangle| \geq t] \leq 2e^{-\frac{t^2}{4(J_0^2 + \alpha d)}}$$

731 which completes the verification of  $K$  since  $(J_0^2 + \alpha d)^{1/2} \leq J_0 + \sqrt{\alpha d}$ .

732 For the counterexample, we may take  $(\alpha, \beta) = (1, 2)$  and let  $\nu$  be the distribution on  $\mathbb{R}$  with density  
 733 proportional to  $e^{-dx^2 \cdot (1+1_{x \geq 0})/2}$ . Then let  $\mu = \nu^{\otimes d}$ , so that  $x \sim \mu$  has IID coordinates with law  $\nu$ .

734 Then the mode  $\mathbf{x}^*$  is indeed zero but the mean of  $\nu$  is non-zero, so taking  $\mathbf{v} = (1, 1, \dots, 1)/\sqrt{d}$ , a

735 Chernoff estimate shows  $\Pr^{\mathbf{x} \sim \mu}[\langle \mathbf{x}, \mathbf{v} \rangle \geq 0] \leq e^{-\Omega(d)}$ .  $\square$
